# Supplementary material for: Human Co-Infection with Avian and Seasonal Influenza Viruses, China
Source: PubMed Central journal article supplement (PMC4214318; doi:10.3201/eid2011.140897), 2014-11
Supplement: 14-0897-Techapp-s1.pdf [file 14-0897-Techapp-s1.pdf]

# Human Co-Infection with Avian and Seasonal Influenza Viruses, China

## Technical Appendix

Technical Appendix Table 1. Summary of PCR primers used to amplify the HA and NA genes

| Gene    | Primer      | Primer sequence (5'→3')              | Source   |
|---------|-------------|--------------------------------------|----------|
| A(RT)   | Uni12       | AGCAAAAGCAGG                         | (1)      |
| H7 & H1 | Bm-HA-1     | TATTCGTCTCAGGGAGCAAAAGCAGGGG         | (1)      |
|         | Bm-NS-890R  | ATATCGTCTCGTATTAGTAGAAACAAGGGTGT     | (1)      |
| H7      | H7-H1F17    | TGGTATTCGCTCTGATTGC                  | Designed |
|         | H7-H1R523   | TAGTCATCTGCGGAATGC                   | Designed |
|         | H7-H2F420   | TAATGGAGCAACCAAGTGC                  | Designed |
|         | H7-H2R944   | GGACATTTTCCAAGTCCCTG                 | Designed |
|         | H7-H3F834   | TGGAGTACAGGTTGATGCCA                 | Designed |
|         | H7-H3R1434  | TTCAAAGCAACCAAGTCCCA                 | Designed |
|         | H7-H4F1303  | TGCTGAACTCTTGGTAGCA                  | Designed |
|         | H7-H4R1674  | AATAGTGCACCGCATGTTTCC                | Designed |
| N9      | Bm-N9-1     | TATTCGTCTCAGGGAGCAAAAGCAGGGTC        | (1)      |
|         | Bm-N9-1473R | ATATCGTCTCGTATTAGTAGAAACAAGGGTCTT    | (1)      |
|         | N9-N1F2     | GCGAAAGCAGGGTCAAGAT                  | Designed |
|         | N9-N1R501   | GCTTATCAGGGCGGATACTG                 | Designed |
|         | N9-N2F416   | ATGCTCTCAGCCAAGGAACAA                | Designed |
|         | N9-N2R924   | TCTATTTGAGCCCTGCCAA                  | Designed |
|         | N9-N3F857   | GCTCATGTTACGGGGAACGA                 | Designed |
|         | N9-N3R1411  | TAGCCCCATCAGGCCAGTT                  | Designed |
| H1      | H1R2-497    | ATGAGGACATGCTGCCGTT                  | Designed |
|         | H1F2-709    | AGTTCAAGCCGGAAATAGC                  | Designed |
|         | H1R3-1366   | AGAACCAACAGTTCGGCAT                  | Designed |
|         | H1F3-1262   | GGGTAAAGAGTTCAACCACCTGG              | Designed |
|         | H1R5-1777   | CGGAGTAGAAACAAGGGTGTT                | Designed |
| N1      | Ba-NA-1     | TATTGGTCTCAGGGAGCAAAAGCAGGAGT        | (1)      |
|         | Ba-NA-1413R | ATATGGTCTCGTATTAGTAGAAACAAGGAGTTTTTT | (1)      |
|         | N1R2-489    | TTCGATATGGGCTCCTGTC                  | Designed |
|         | N1F2-421    | TGACTCAAGGGGCTTGCTA                  | Designed |
|         | N1R3-1246   | TGCTGAACAAAAGTCCCGCT                 | Designed |
|         | N1F3-917    | GAATCGACCGTGGGTGTCTT                 | Designed |

| Gene  | Primer    | Primer sequence (5'→3')     | Source   |
|-------|-----------|-----------------------------|----------|
|       | N1R6-1457 | TGCGTCCGAGTAGAAACAAGGAG     | Designed |
| B(RT) | Uni11     | AGCAGAAGCRS                 | (2)      |
| B-HA  | BHF1-1    | TTTCTAATATCCACAAAATGAAGGCAA | Designed |
|       | BHR1-234  | GACAGTCCGGGCATAGTTTC        | Designed |
|       | B-HA-F    | ATCCACAAAATGAAGGCAATA       | (3)      |
|       | B-HA-PR   | TGCAGGAGGTCTATATTGG         | (3)      |
|       | BHF3-778  | TACCACAAAAGCGGCAGAATT       | Designed |
|       | BHR3-1451 | TGCCAATAGATGCTCGTC          | Designed |
|       | BHF4-1285 | ACCTTCAAAGACTAAGTGGTGC      | Designed |
|       | BHR6-1847 | GCGCTCAATAACGTTTCTTTG       | Designed |
| B-NA  | BNA-F1    | CTGAGGCAAATAGGCCAAAAATG     | (2)      |
|       | BNA-R1    | GGGTTTAGAACAGACTCAACC       | (2)      |
|       | BNA-280F  | AAAGCACTCCTAATTAGCCC        | (2)      |
|       | BNA-467R  | GATGCCTCAGCTTGTCTG          | (2)      |
|       | BNA-537F  | GTCCGCATGCCATGATGGTA        | (2)      |
|       | BNA-871R  | GCTGTGTAAGTGTATCTCTACA      | (2)      |
|       | BNF-861   | AAGAATGCACATGCGGATTTGCTA    | Designed |
|       | BNR-1270  | AAAGGAGTACCAACCAGGTTCTT     | Designed |
|       | BNA-1090F | TGGTACTCTCGAACGATGTC        | (2)      |

Technical Appendix Table 2. GISAID or GenBank accession numbers of influenza viruses in the construction of the HA and NA phylogenetic trees

| Viruses                                  | Segments  |           | Viruses                                   | Segments   |            |
|------------------------------------------|-----------|-----------|-------------------------------------------|------------|------------|
|                                          | HA        | NA        |                                           | HA         | HA         |
| A/Hangzhou/10-1/2014(H7N9)               | EPI509669 | EPI509670 | A/Chicken/Shanghai/S1053/2013(H7N9)       | EPI440685  | EPI440684  |
| A/Hangzhou/10-2/2014(H1N1)               | EPI509671 | EPI511870 | A/Environment/Shanghai/S1088/2013(H7N9)   | EPI440693  | EPI440692  |
| A/Hangzhou/17-1/2014(H7N9)               | EPI509672 | EPI509673 | A/Shanghai/4664T/2013(H7N9)               | EPI446962  | EPI446965  |
| B/Hangzhou/17-2/2014                     | EPI509674 | EPI509675 | A/goose/Jiangsu/K27/2013(H7N9)            | EPI442706  |            |
| A/Zhejiang/22/2013(H7N9)                 | EPI477410 | EPI477412 | A/chicken/Jiangsu/K89/2013(H7N9)          | EPI442707  |            |
| A/Nanjing/M2/2013(H7N9)                  | EPI450526 | EPI450527 | A/duck/Zhejiang/12/2011(H7N3)             | JQ906576.1 |            |
| A/Zhejiang/DTID-ZJU01/2013(H7N9)         | EPI441794 | EPI441797 | A/duck/Hokkaido/143/2003(H7N1)            | AB269694.  |            |
|                                          |           |           |                                           | 2          |            |
| A/chicken/Zhejiang/DTID-ZJU01/2013(H7N9) | EPI442721 | EPI442723 | A/duck/Mongolia/867/2002(H7N1)            | AB473543.  |            |
|                                          |           |           |                                           | 1          |            |
| A/Shanghai/1/2013(H7N9)                  | EPI439486 | EPI439487 | A/WildBird/Korea/5-77/2005(H7N8)          | JX444827.1 |            |
| A/Shanghai/2/2013(H7N9)                  | EPI439502 | EPI439500 | A/WildBirdFeces/Korea/HDR22/2006(H7N7)    | FJ750875.1 |            |
| A/Anhui/1/2013(H7N9)                     | EPI439507 | EPI439509 | A/WildBirdFeces/Shihwa/21/2006(H7N3)      | FJ767723.1 |            |
| A/Taiwan/1/2013(H7N9)                    | EPI445912 | EPI445914 | A/WildBird/Korea/A330/2009(H7N7)          | JN244227.1 |            |
| A/Hangzhou/1/2013(H7N9)                  | EPI440095 | EPI440096 | A/quail/Thailand/CU-J2882/2009(H7N1)      | JX523347.1 |            |
| A/Hangzhou/2/2013(H7N9)                  | EPI442710 | EPI442711 | A/WildBird/Korea/A9/2011(H7N9)            |            | JN244234.1 |
| A/environment/Hangzhou/34/2              | EPI442716 | EPI442717 | A/mallard/CzechRepublic/13438-29K/2010(H1 |            | JF789602.1 |

| Viruses                            | Segments  |           | Viruses                                  | Segments |                |
|------------------------------------|-----------|-----------|------------------------------------------|----------|----------------|
|                                    | HA        | NA        |                                          | HA       | HA             |
| 013(H7N9)                          |           |           | 1N9)                                     |          |                |
| A/chicken/Hangzhou/48-1/2013(H7N9) | EPI443659 | EPI443661 | A/goose/CzechRepublic/1848-K9/2009(H7N9) |          | GU060482.<br>1 |
| A/chicken/Hangzhou/50-1/2013(H7N9) | EPI454491 | EPI454492 | A/AnasCrecca/Spain/1460/2008(H7N9)       |          | HQ244409.<br>1 |
| A/Fujian/1/2013(H7N9)              | EPI446746 | EPI446747 | A/duck/Mongolia/119/2008(H7N9)           |          | AB481213.<br>1 |
| A/Shanghai/3/2013(H7N9)            | EPI443022 | EPI443023 | A/WildDuck/Korea/SH20-27/2008(H7N9)      |          | JX679164.1     |
| A/Shanghai/4/2013(H7N9)            | EPI443025 | EPI443026 | A/mallard/Sweden/65/2002(H10N9)          |          | CY060360.<br>1 |
| A/Pigeon/Shanghai/S1069/2013(H7N9) | EPI440701 | EPI440700 | A/mallard/Netherlands/11/1999(H2N9)      |          | CY122246.<br>1 |

## References

- Hoffmann E, Stech J, Guan Y, Webster RG, Perez DR. Universal primer set for the full-length amplification of all influenza A viruses. *Arch Virol.* 2001;146:2275–89. [PubMed http://dx.doi.org/10.1007/s007050170002](http://dx.doi.org/10.1007/s007050170002)
- Dapat C, Saito R, Kyaw Y, Naito M, Hasegawa G, Suzuki Y, et al. Epidemiology of human influenza A and B viruses in Myanmar from 2005 to 2007. *Intervirology.* 2009;52:310–20. [PubMed http://dx.doi.org/10.1159/000237738](http://dx.doi.org/10.1159/000237738)
- Roy T, Agrawal AS, Mukherjee A, Mishra AC, Chadha MS, Kaur H, et al. Surveillance and molecular characterization of human influenza B viruses during 2006–2010 revealed co-circulation of Yamagata-like and Victoria-like strains in eastern India. *Infect Genet Evol.* 2011;11:1595–601. [PubMed http://dx.doi.org/10.1016/j.meegid.2011.05.022](http://dx.doi.org/10.1016/j.meegid.2011.05.022)

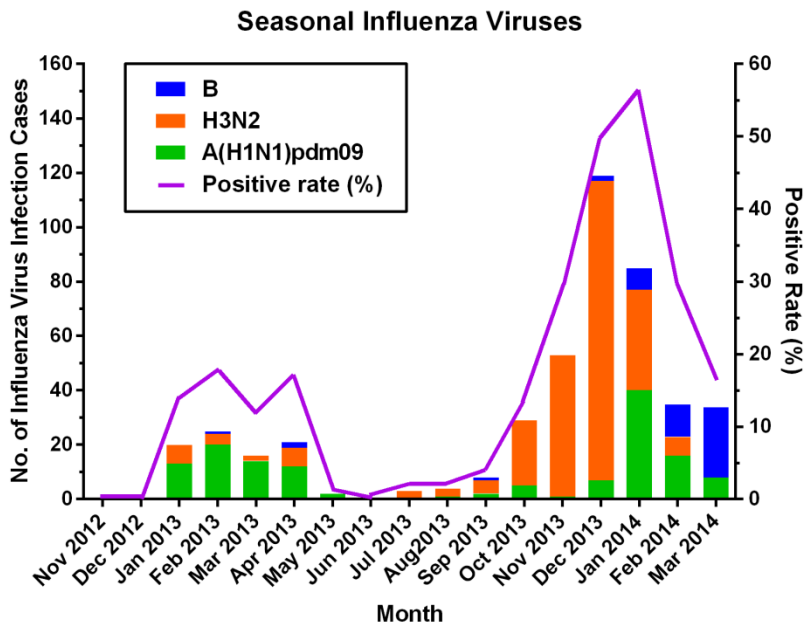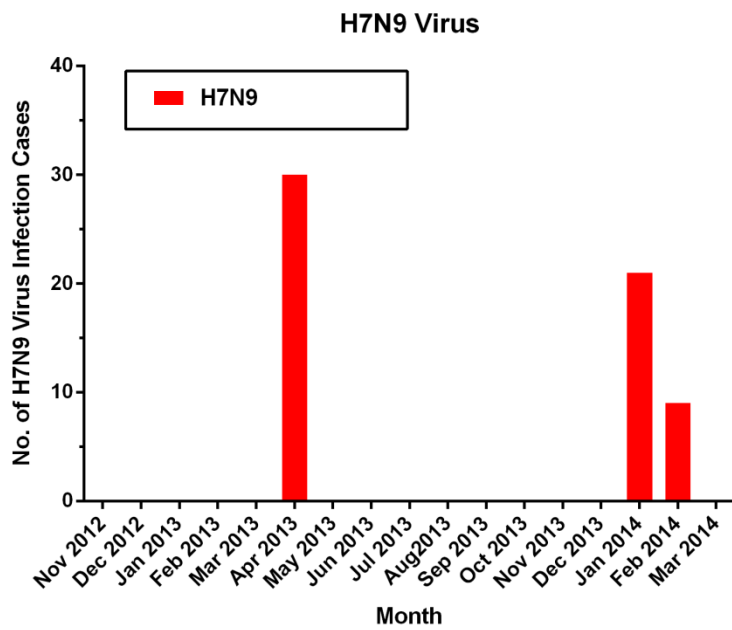

Technical Appendix Figure. Number of seasonal influenza virus infections among patients with influenza-like illness at 2 sentinel hospitals, and positivity rate, by month (upper panel) and number of influenza A(H7N9) virus infections in Hangzhou, China (lower panel). Positivity rate = no. patients with influenza-like illness who were positive for any 1 of the 3 seasonal influenza viruses/no. patients with influenza-like illness tested × 100.
